# Supplementary material
Source: PubMed Central journal article supplement (PMC6857465)
Supplement: Supp_Fig1.pdf [file Supp_Fig1.pdf]

## Supplementary Data

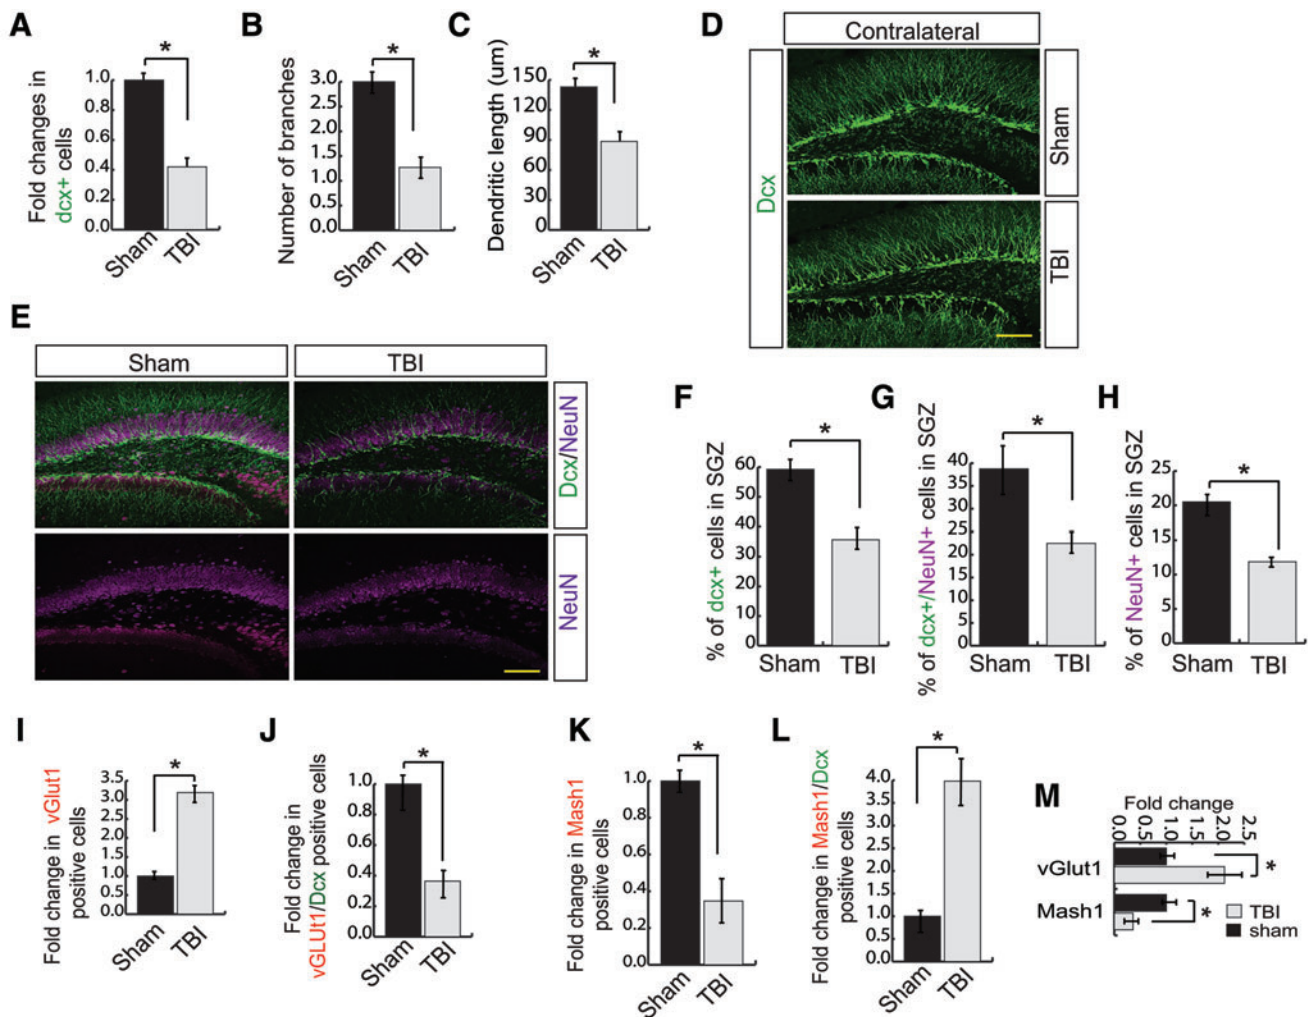

**SUPPLEMENTARY FIG. S1.** Quantitative analysis of neurogenesis and vGlut1- and Mash1-positive cells. **(A)** The fold changes in the intensity of green fluorescent for Dcx staining was monitored between TBI and sham mice. **(B,C)** The number of branches **(B)** and total dendritic length **(C)** was decreased in Dcx-positive cells in TBI mice compared with sham mice. **(D)** There is no significant difference in Dcx-positive cells in the contralateral cortex of TBI and sham mice. **(E–H)** Double staining with Dcx (immature neurons, green) and NeuN (mature neurons, purple) **(E)** showed that percentage of Dcx-positive cells **(F)**, percentage of NeuN-positive cells within the population of Dcx-positive cells **(G)**, and percentage of NeuN-positive cells **(H)** were decreased in TBI compared with Sham mice. **(I)** Quantitative analysis showed that vGlut1-positive cells were increased significantly in the DG of the hippocampus following TBI. **(J)** The ratio of vGlut1/Dcx-positive cells was decreased in TBI mice as the number of vGlut1-positive cells were increased along with a decrease in Dcx-positive cells. **(K)** The fold changes in the intensity of red fluorescent for Mash1 staining was monitored between TBI and sham mice. **(L)** The ratio of Mash1/Dcx-positive cells was increased in TBI mice as the number of Mash1-positive cells were decreased along with a decrease in Dcx-positive cells. **(M)** The fold changes in the level of vGlut1 and Mash1 was monitored in both groups. Statistical significance was measured by one-way ANOVA with a Tukey-Kramer post hoc correction,  $n=7$ ,  $*p<0.05$ . All data are expressed as mean  $\pm$  SEM. Scale bar = 20  $\mu$ m. ANOVA, analysis of variance; Dcx, Doublecortin; DG, dentate gyrus; SEM, standard error of the mean; TBI, traumatic brain injury; vGlut1, vesicular glutamate transporter 1.
